# Supplementary material
Source: PubMed Central journal article supplement (PMC4538543)
Supplement: AAC.00771-15_zac009154305so1.pdf [file AAC.00771-15_zac009154305so1.pdf]

**TABLE S1.** Oligonucleotides used in this study.

| Oligonucleotides | Description                          | Comments or RE <sup>a</sup> site |
|------------------|--------------------------------------|----------------------------------|
| pBT-QnrB1-F      | GCGGGAATTCTATGGCTCTGGCACTCGTTG       | EcoRI                            |
| pBT-QnrB1-R      | CTCGAATTCCTCGAGTTACTAACCAATCACCGC    | XhoI                             |
| pTRG-GyrA-F      | ATGGATCCATGAGCGACCTTGCGA             | BamHI                            |
| pTRG-GyrA-R      | GCGGGAATTCTTATTCTTCTTCTGGCTC         | EcoRI                            |
| pTRG-GyrB-F      | ACTCA GGATCCATGTCGAATTCTTATGACT      | BamHI                            |
| pTRG-GyrB-R      | AGTAACTCGAGTTAAATATCGATATTCGCCGCTTTC | XhoI                             |
| pTRG-GyrBA-F     | GCGCGGATCCATGTCGAATTCTTATGACTCCT     | BamHI                            |
| pTRG-GyrBA-R     | ATCGCTCGAGTTATTCTTCTTCTGGCTCGTCGTC   | XhoI                             |
| PBT-F            | TCCGTTGTGGGGAAAGTTAT                 | Colony PCR <sup>b</sup>          |
| PBT-R            | CAGGGTAGCCAGCAGCAT                   | Colony PCR                       |
| PTRG-F           | TGGCTGAACAACCTGGAAGCT                | Colony PCR                       |
| PTRG-R           | ATTCGTGCCCCGCCATAA                   | Colony PCR                       |
| ΔC5-F            | GCGGGAATTCTATGGCTCTGGCA              | EcoRI                            |
| ΔC5-R            | CAATCTCGAGGATGCCAAGTCGCT             | XhoI                             |
| ΔC10-F           | GCGGGAATTCTATGGCTCTGGCA              | EcoRI                            |
| ΔC10-R           | CAAGCTCGAGCATGAGCAACGATG             | XhoI                             |
| ΔN5-F            | GCGGGAATTCTATGGGCGAAAAAATTGACA       | EcoRI                            |
| ΔN5-R            | CTCGAATTCCTCGAGTTACTAACCAATCACCGC    | XhoI                             |
| ΔN10-F           | GCGGGAATTCTATGAGAAACCGTTTCACCG       | EcoRI                            |
| ΔN10-R           | CTCGAATTCCTCGAGTTACTAACCAATCACCGC    | XhoI                             |
| ΔN20-F           | GCGGGAATTCTATGAATAGTACATTTTTTAA      | EcoRI                            |
| ΔN20-R           | CTCGAATTCCTCGAGTTACTAACCAATCACCGC    | XhoI                             |
| Q51A-F           | TCGTGAAAGCGCTAAAGGGTG                | SDM <sup>c</sup>                 |

|                  |                                                              |     |
|------------------|--------------------------------------------------------------|-----|
| Q51A-R           | TCATAGAACTGACAGCCGATAAAATTCAGT                               | SDM |
| I105A-F          | TATGAATATGGCTACCACGCGC                                       | SDM |
| I105A-R          | AAGCTTGCGCCGCG                                               | SDM |
| $\Delta$ 105I-F  | TATGAATATGGCTACCACGCGC                                       | SDM |
| $\Delta$ 105I-R  | CATATTCATAAAGCTTGCGCCG                                       | SDM |
| T106A-F          | GAATATGATCGCCACGCGCAC                                        | SDM |
| T106A-R          | ATAAAGCTTGCGCCGCGGAA                                         | SDM |
| $\Delta$ 106T-F  | GAATATGATCACGCGCACCTG                                        | SDM |
| $\Delta$ 106T-R  | ATAAAGCTTGCGCCGCGGAA                                         | SDM |
| F111A-F          | CGCACCTGGGCTTGTAGCGC                                         | SDM |
| F111A-R          | CGTGGTGATCATATTCATAAAGCT                                     | SDM |
| $\Delta$ loopA-F | AAAGGGTGCAATTTTAGTCGTGC                                      | SDM |
| $\Delta$ loopA-R | GAACTGACAGCCGATAAAATTCAGT                                    | SDM |
| $\Delta$ loopB-F | GCATATATCACGAATACCAATCTAAGCTAC                               | SDM |
| $\Delta$ loopB-R | ATTCATAAAGCTTGCGCCGCG                                        | SDM |
| $\Delta$ loopA+B | Dual SDM using primers for $\Delta$ loopA and $\Delta$ loopB | SDM |
| GYRBS83L-F       | CATGGTGACTTGGCGGTCTATG                                       | SDM |
| GYRBS83L-R       | GGGATGGTATTTACCGATTACGTC                                     | SDM |

<sup>a</sup>RE, restriction enzyme

<sup>b</sup>PCR, polymerase chain reaction

<sup>c</sup>SDM, site-directed mutagenesis
